# Supplementary material
Source: PubMed Central journal article supplement (PMC6597304)
Supplement: NIHMS1523525-supplement-7.pdf [file NIHMS1523525-supplement-7.pdf]

In accordance to Nature Publishing Groups Authorship Policy we agree to change the authors of the manuscript as indicated below.

**NAME OF JOURNAL:** Oncogene

**TITLE OF MANUSCRIPT:** Identification and Characterization of Two Novel Oncogenic mTOR Mutations

**MANUSCRIPT NUMBER:** MS#ONC-2018-02052

**CORRESPONDING AUTHORS NAME:** Mingzhao Xing

**PREVIOUS AUTHOR NAMES:** Avaniyapuram Kannan Murugan, Mingzhao Xing

**UPDATED AUTHOR NAMES:** Avaniyapuram Kannan Murugan, Rengyun Liu, Mingzhao Xing

**CHANGE TO AUTHOR LIST:** Rengyun Liu. In preparing for the reviewers' comments with new experiments, this author substantially contributed for generating data on testing sensitivity of tesselolimus on various mTOR mutants and hence deserve for a co-author in this manuscript.

| Print name                  | Signature                                                                            | Date          |
|-----------------------------|--------------------------------------------------------------------------------------|---------------|
| Avaniyapuram Kannan Murugan | 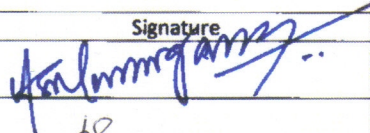 | 11.02.2019    |
| Rengyun Liu                 |   | Feb. 11, 2019 |
| Mingzhao Xing               |  | 02-11-2019    |
|                             |                                                                                      |               |
|                             |                                                                                      |               |
